# Supplementary material for: One-pot synthesis of molybdenum oxide nanoparticles encapsulated in hollow silica spheres: an efficient and reusable catalyst for epoxidation of olefins
Source: Royal Society of Chemistry journal article supplement (doi:10.1039/c7ta06288e), 2017-01-01
Supplement: c7ta06288e1.pdf [file c7ta06288e1.pdf]

## **Electronic Supplementary Information (ESI)**

# **One-pot synthesis of molybdenum oxide nanoparticles encapsulated in hollow silica spheres: an efficient and reusable catalyst for epoxidation of olefins**

**Yasutaka Kuwahara,<sup>a,b</sup> Naoyuki Furuichi,<sup>a</sup> Hiroyuki Seki<sup>c</sup> and Hiromi Yamashita<sup>a,b\*</sup>**

<sup>a</sup> Division of Materials and Manufacturing Science, Graduate School of Engineering, Osaka University, 2-1 Yamada-oka, Suita, Osaka 565-0871, Japan

<sup>b</sup> Unit of Elements Strategy Initiative for Catalysts & Batteries (ESICB), Kyoto University, Katsura, Kyoto 615-8520, Japan

<sup>c</sup> Central Technical Research Laboratory, JXTG Nippon Oil & Energy Corp., 8 Chidori-cho, Naka-ku, Yokohama, Kanagawa 231-0815, Japan.

\* Tel: (+81) 6-6879-7457, Fax: (+81) 6-6879-7457

E-mail: yamashita@mat.eng.osaka-u.ac.jp

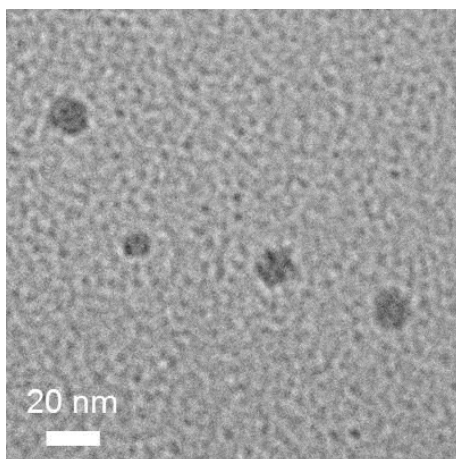

**Fig. S1** TEM image of MoO<sub>x</sub> NPs-PAA (poly(acrylic acid)) aggregates.

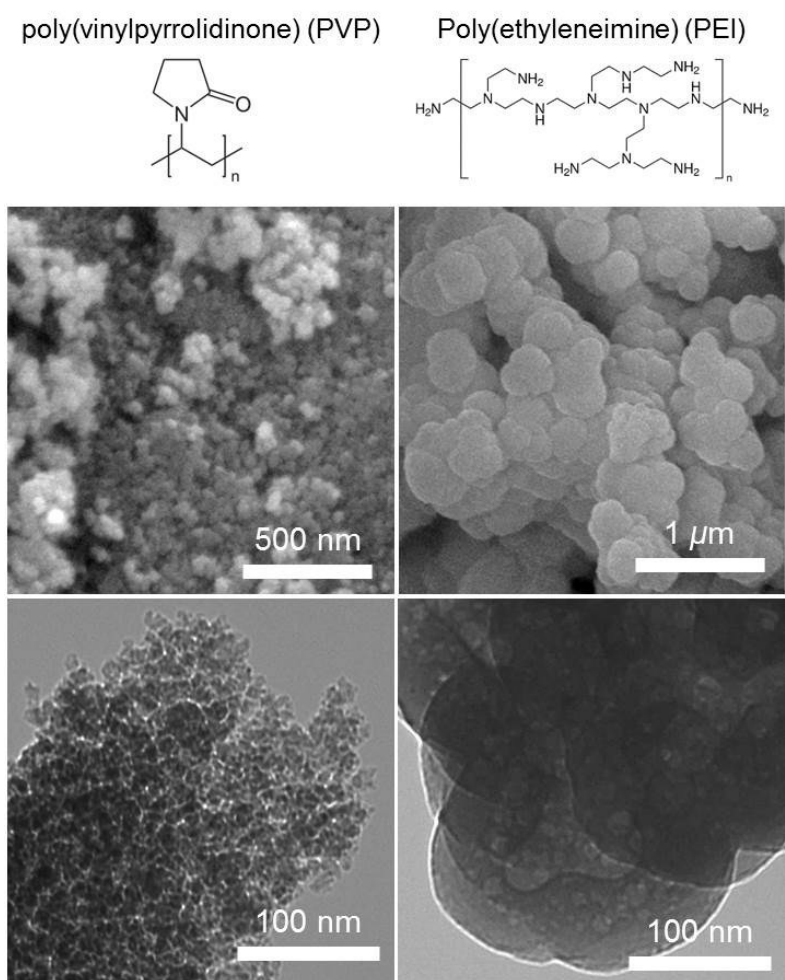

**Fig. S2** (above) FE-SEM and (below) TEM images of MoO<sub>x</sub>-SiO<sub>2</sub> composites prepared by using poly(vinylpyrrolidinone) (PVP, K-30;  $M_w = 30,000$ ) and poly(ethyleneimine) (PEI;  $M_w = 1,800$ ) as organic templates instead of PAA (poly(acrylic acid)).

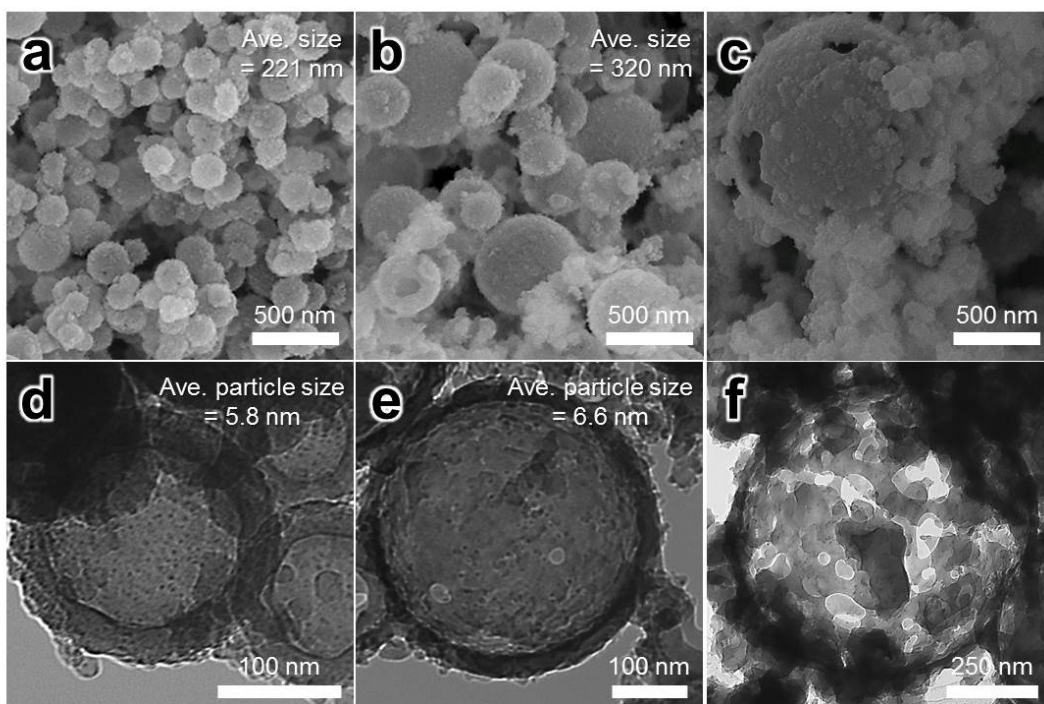

**Fig. S3** (above) FE-SEM and (below) TEM images of  $\text{MoO}_x\text{@HSS-2}$  catalysts synthesized with varied amounts of Mo contents ((a, d) 7 (b, e) 14 and (c, f) 28 wt% as  $\text{MoO}_3$  in initial synthetic solutions).

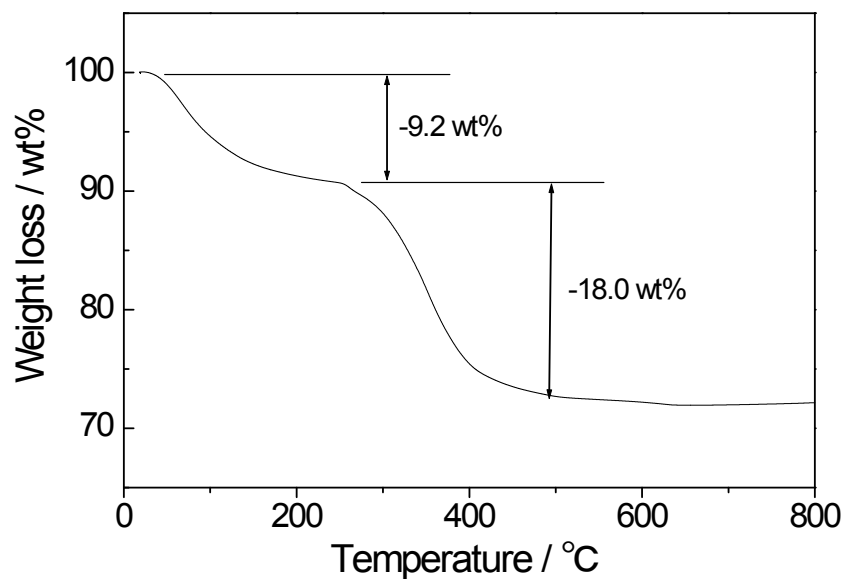

**Fig. S4** Weight loss curve of as-synthesized  $\text{MoO}_x\text{@HSS-2}$  catalyst. The weight loss seen below 250 °C is ascribed to the desorption of physisorbed molecules and the weight loss seen above 250 °C is ascribed to the elimination of PAA (poly(acrylic acid)) and alkyl groups of dodecyltrimethoxysilane ( $\text{C}_{12}\text{TMS}$ ).

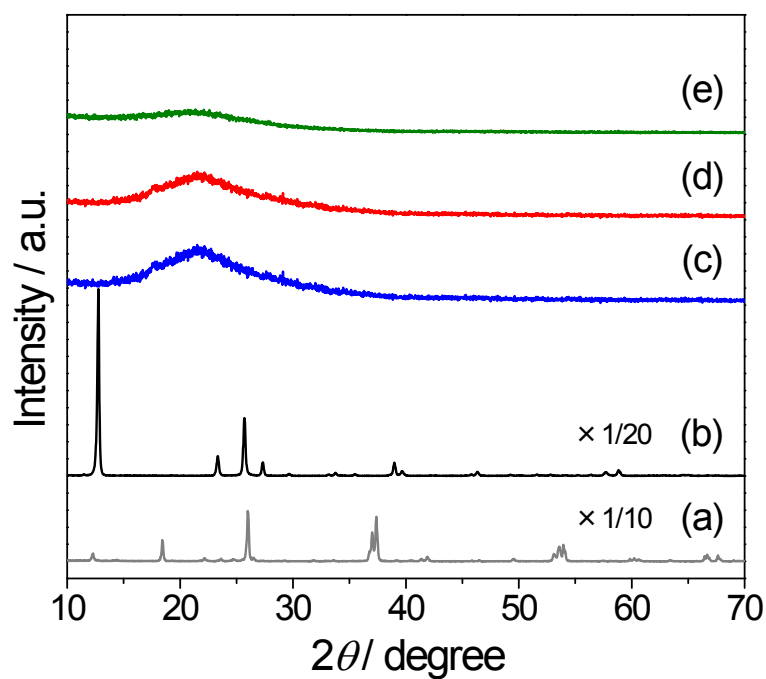

**Fig. S5** XRD patterns of (a)  $\text{MoO}_2$  powder, (b)  $\text{MoO}_3$  powder, (c)  $\text{MoO}_x\text{@HSS-0}$ , (d)  $\text{MoO}_x\text{@HSS-2}$  and (e)  $\text{MoO}_x/\text{SiO}_2$ . The broad peak seen at  $2\theta = 15\text{-}30^\circ$  is attributed to amorphous nature of silica.

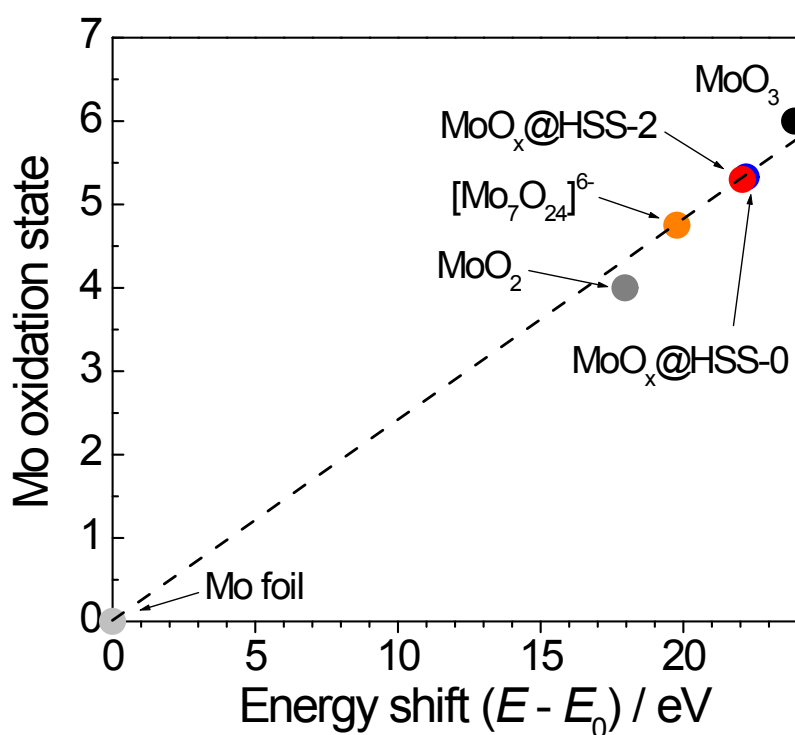

**Fig. S6** Correlation between the energy shift (based on Mo foil) and oxidation state of Mo atoms in the prepared samples and reference Mo compounds.
